1 Intraspecific variation in Artiodactyla social organisation: A Bayesian phylogenetic multilevel  
2 analysis of detailed population-level data

3

4 Miles, M.I.<sup>1</sup>, Jaeggi, A. V.<sup>2,3</sup>, Festa-Bianchet, M.<sup>4</sup>, Schradin, C.<sup>5,6</sup>, & Hayes, L.D.<sup>1</sup>

5

6 <sup>1</sup> Department of Biology, Geology, and Environmental Science, University of Tennessee at  
7 Chattanooga, USA

8 <sup>2</sup> Department of Anthropology, Emory University, 1557 Dickey Drive, Atlanta, GA 30322, USA

9 <sup>3</sup> Institute of Evolutionary Medicine, University of Zurich, Wintherthurerstr. 190, 8057 Zurich,  
10 Switzerland

11 <sup>4</sup> Département de biologie, Université de Sherbrooke, Sherbrooke, QC J1K 2R1, Canada

12 <sup>5</sup> School of Animal, Plant & Environmental Sciences, University of the Witwatersrand, Private  
13 Bag 3, WITS 2050, Johannesburg, SOUTH AFRICA

14 <sup>6</sup> IPHC, UNISTRA, CNRS, 23 rue du Loess, 67200 Strasbourg, France

15

16 Corresponding authors

17

18 Loren Hayes: [loren-hayes@utc.edu](mailto:loren-hayes@utc.edu)

19 Adrian Jaeggi: [adrian.jaeggi@iem.uzh.ch](mailto:adrian.jaeggi@iem.uzh.ch)

20

21 **Abstract**

22

23 Understanding *inter*-specific variation in social systems is a major goal of behavioural ecology.  
24 Previous comparative studies of mammalian social organisation produced inconsistent results,  
25 possibly because they ignored *intra*-specific variation in social organisation (IVSO). The  
26 Artiodactyla have been the focus of many comparative studies as they occupy a wide diversity of  
27 habitats and exhibit large variation in life history patterns as well as other potential correlates of  
28 social organisation. Here we present the first systematic data on IVSO among Artiodactyla, infer  
29 their ancestral social organisation, and test whether habitat, sexual dimorphism, seasonal  
30 breeding, and body size predict inter- and intraspecific variation in social organisation. We found  
31 data on social organisation for 110 of 226 artiodactyl species, of which 74.5% showed IVSO.  
32 Using Bayesian phylogenetic multilevel models, the ancestral artiodactyl population was  
33 predicted to have a variable social organisation with significantly higher probability (0.77, 95%  
34 CI 0.29-1.00) than any non-variable form (i.e. solitary, pair-living, group-living). Greater sexual  
35 dimorphism and smaller body size both predicted more IVSO; smaller body size also predicted a  
36 higher likelihood of pair-living. Our results challenge the long-held assumption that ancestral  
37 Artiodactyla were pair-living and strongly imply that taking IVSO into account is crucial for  
38 understanding mammalian social evolution.

39

40 Key words: Intraspecific variation, Social organisation, Artiodactyla, phylogenetic mixed-effects  
41 model

## 42 **1. Introduction**

43

44 Animals show remarkable *inter*-specific variation in social systems [1, 2], and understanding the  
45 sources of this diversity is a major goal of behavioural ecology. Social systems are characterized  
46 by four components [3, 4]: i) social organisation: the size, sex-age, and kin composition of  
47 groups, ii) mating system, iii) social structure: relationships emerging from repeated interactions  
48 among individuals, and iv) parental and allo-parental care. These components are interdependent.  
49 For example, the number and spatial distribution of individuals characterize their social  
50 organisation but also constrain their mating tactics [4].

51

52 There have been numerous comparative analyses of mammalian social organisation [6-8].  
53 However, inconsistent results have emerged from these studies for several taxa, including  
54 primates and carnivorans. In primates, it has been suggested that pair-living species evolved  
55 exclusively from solitary [7] or from both solitary and group-living ancestors [8, 9]. In  
56 carnivorans, the long-held hypothesis that social evolution involved transitions in social  
57 organisation from a solitary ancestor into more advanced forms of group living [solitary ancestor  
58 hypothesis: 10, 11] has been questioned [6].

59

60 These inconsistent results likely occurred for several reasons. First, studies have relied on  
61 different datasets, methods of analysis, and conceptual frameworks [3]. In an effort to account  
62 for as many species as possible, some studies relied on information from secondary sources and  
63 taxonomic inference, such as the untested assumption that members of the same genus share the  
64 same social organisation [12]. Other studies used confusing terminology or failed to distinguish  
65 between social organisation and mating system [3]. For example, some studies inferred  
66 monogamy (mating system) from the observation of male-female pairs (social organisation) [9,  
67 13]. To resolve these issues, comparative studies should rely exclusively on data from primary  
68 sources, and distinguish social organisation from other social system components.

69

70 Most comparative studies of mammalian social organisation relied on a single trait value for each  
71 species, yet social systems can be dynamic [14-16]. *Intraspecific* variation in social organisation  
72 (IVSO) occurs when adults of a species show two or more forms of social organisation [6, 14,

73 17]. Variation can also occur in the composition of groups, such that a species may live in  
74 different types of groups, e.g., unisex vs. multi-sex groups. In mammals, IVSO has been reported  
75 in numerous species from different orders [6, 18-22], transforming our understanding of  
76 mammalian social evolution. For example, in carnivorans (Order: Carnivora) and shrews (Order:  
77 Euliptophya), it was long believed that the ancestral state was solitary. However, a variable  
78 ancestral state was found to be equally likely after taking IVSO into account (Carnivora: [6];  
79 Euliptophya: [21]). More broadly, ignoring intraspecific variation can increase statistical type II  
80 error rates [23-25] and lead to spurious conclusions about social evolution [17, 26]. Modern  
81 comparative methods such as phylogenetic mixed-effects (a.k.a. multilevel) models or  
82 measurement-error models [24, 27] can easily incorporate intraspecific variation. Thus,  
83 comparative studies should include intraspecific variation in social organisation.

84

85 IVSO may arise, for example, if individuals of both sexes can respond to unpredictable or  
86 changing ecological conditions by changing their social tactic [16, 17]. Further, IVSO may vary  
87 with body size, which correlates strongly with life-history pace [34] as well as available anti-  
88 predator strategies [35]. Intraspecific variation in group size and composition is also expected in  
89 seasonal breeders. During the breeding season, reproductive competition can exclude some  
90 individuals from groups, thus causing IVSO [36]. Alternatively, relaxed competition during the  
91 non-breeding season may allow the formation of larger groups, particularly if grouping has  
92 survival benefits [e.g., anti-predator strategies; 18, 37]. Thus, we expect greater variability in  
93 social organisation among species occupying a wider range of habitats and among seasonal  
94 breeders.

95

96 The order Artiodactyla is well suited for comparative studies of social evolution because its  
97 members exhibit both inter- and intraspecific variation in social organisation, occupy a wide  
98 diversity of habitat types, and exhibit a range of body sizes, sexual dimorphism, as well as both  
99 seasonal and non-seasonal breeding [18, 38]. Habitat heterogeneity and availability of protective  
100 cover are associated with *interspecific* variation in social organisation of many artiodactyls [18].  
101 Generally, groups are larger in open areas [18, 39], with solitary species mostly living in dense  
102 forests [40]. Group-living and large body size are adaptations to open habitats characterized by  
103 high predation risk [41]. Sexual dimorphism in body size and seasonal breeding, common in

104 artiodactyls, are also associated with interspecific variation in social organisation [18]. Most  
105 sexually dimorphic species live in unisex groups or as solitary individuals, forming mixed sex  
106 groups only in the breeding season [42, 43], [but see 44, 45]. Monomorphic species live alone, in  
107 pairs, or mixed sex groups [46]. Sexual dimorphism is also correlated with body size [18]. We  
108 therefore expected these factors to influence IVSO.

109

110 We first describe *interspecific* and *intraspecific* variation in artiodactyl social organisation, using  
111 only data from published studies on wild populations. Our second objective was to infer the  
112 ancestral social organisation of artiodactyls. We used a detailed phylogeny and modern  
113 comparative methods to evaluate competing hypotheses about artiodactyl social evolution,  
114 namely 1) from pair-living to group-living [7] or 2) from IVSO to single types of social  
115 organisation [6]. Our third objective was to determine the extent to which habitat, sexual  
116 dimorphism, body size and breeding seasonality predict variation in social organisation.  
117 Specifically, we predicted that the likelihood of IVSO and the total number of social  
118 organisations in a species (i) increase with greater number of habitats, (ii) decrease in open  
119 habitats due to predation pressure favoring group-living, (iii) sexually dimorphic than  
120 monomorphic species and (iv) are greater in seasonal breeders than non-seasonal breeders.

121

## 122 **2. Methods**

123

### 124 (a) Data collection

125

126 Searches were conducted using Web of Science and Google Scholar to find primary sources  
127 reporting social organisation for all 226 extant species of Artiodactyla [47]. The initial search  
128 consisted of the scientific name (genus and species) and a keyword ('social', 'herd', or 'group').  
129 If no sources were found, a final search used only the scientific name. In *Web of Science*, search  
130 results were refined by selecting three research areas: 'zoology', 'behavioral science', and  
131 'environmental science/ecology', and document type 'article'. Lab-based studies, studies in  
132 enclosures smaller than 1,000-hectares, and studies that included manipulation of individuals,  
133 groups, or resources were discarded. From the 267 primary sources, we coded the following  
134 social organisation(s): 1) Solitary, 2) Pair-living, 3) Sex-specific social organisation 4) Unisex

135 groups, 5) Single female/multi-male, 6) Multi-female/single male, and 7) Multi-female/multi-  
136 male (Supplementary Material Table S1).

137

138 (b) Determining variable social organisation

139

140 Variable social organisation was identified when 1) both sexes had more than one form of social  
141 organisation in the same population [e.g., solitary and pair-living; 17] or between populations or  
142 2) multiple types of groups occurred within the same population or in different populations (e.g.,  
143 FFM and FFMM groups). For statistical analyses, overall population-level social organisations  
144 were categorized as: 1) Solitary, 2) Pair-living, 3) Sex-specific, 4) Non-variable group-living,  
145 and 5) variable, including populations with multiple forms of group-living. We categorized cases  
146 where one sex was solitary and the other was in unisex groups as a specific form of social  
147 organisation (sex-specific) and cases in which both sexes lived in unisex groups as a form of  
148 group-living. Additional details are provided in Supplementary Material S2.

149

150 (c) Predictor variables

151

152 Each species was categorized as either seasonal or non-seasonal breeder [38]. The extent of  
153 sexual dimorphism was calculated as the ratio of adult male to female body mass using data  
154 reported in Pérez-Barbería & Gordon [38]. Body size was included as mean adult female body  
155 mass. Habitat type was derived from the primary source and categorized based on IUCN  
156 classification ([www.iucn.org](http://www.iucn.org)) as desert, forest, rocky areas, savanna, grassland, shrubland,  
157 wetlands, or artificial.

158

159 (d) Phylogeny

160

161 We used the mammal supertree from Bininda-Emonds et al. [48]. Some species names in the  
162 database had to be amended to match the phylogeny as detailed in the accompanying R code. In  
163 virtually all cases, a name mismatch could be resolved by finding a pseudonym for that species  
164 through [www.iucn.org](http://www.iucn.org), or by using a sister species that was not included in the database. In one

165 case, two closely-related taxa missing from the supertree (*Moschus leucogaster* and *Moschus*  
166 *cupreus*) were proxied by the same sister species (*Moschus chrysogaster*).

167

168 (e) Statistical analysis

169

170 We used Bayesian phylogenetic mixed-effects models, accounting for the multilevel structure of  
171 the data (populations nested within species) and the phylogenetic relationships among species  
172 [24, 27]. Predictors included sexual dimorphism, female body size, breeding seasonality, and  
173 number of habitats. Type of habitat was modeled as a random intercept. All models controlled  
174 for research effort by including the number of studies. To control for potential geographical  
175 biases continent was included as a random intercept.

176

177 Prior to fitting the model, we estimated the likely ancestral state for body size, sexual  
178 dimorphism, and breeding seasonality (see Supplementary Material 3). We then centered body  
179 size and sexual dimorphism on these estimated ancestral states and chose the likely ancestral  
180 breeding seasonality as the reference category. Consequently, the estimated ancestral social  
181 organisation (i.e. the global intercepts of the multilevel models) is contingent on predictors that  
182 are *also* at their likely ancestral state.

183

184 To model the likelihood of several mutually exclusive categorical traits (i.e. different social  
185 organisations) and how the likelihood of each trait was affected by other variables we used a  
186 multinomial model [52] (see Supplementary Material 3). We highlight any covariates that  
187 influence the likelihood of different social organisations, and thus may explain evolutionary  
188 transitions from the ancestral state. Additional details are in Supplementary Material 4.

189

190 We fit all models in a Bayesian framework [53] in Stan [54] through the RStan interface [55]  
191 using *brms* v. 2.5.1. [56]. Bayesian estimation produces a posterior probability distribution for  
192 each parameter, which can be summarized in various ways; here we report the mean and 95%  
193 credible intervals and occasionally the proportion of the posterior that lies above or below a  
194 certain value (“PP”). Phylogenetic signal was calculated as the proportion of variance captured  
195 by the phylogenetic random effect(s) following [57]. All models converged as assessed with the

196 potential scale reduction factor (all  $\leq 1.01$ ), effective sample sizes (all  $> 500$ ), and by visually  
197 examining trace plots of the Markov chains. Details on model fitting can be gleaned from the  
198 accompanying R code (available at <https://github.com/adrianjaeggi/artiodactyl.socialorg>).

199

### 200 **3. Results**

201

202 We found data on social organisation for 247 populations from 110 of the 226 extant artiodactyl  
203 species. The majority of these species showed variation in their social organisation at the species  
204 level (74.5%, 82 out of 110). Five species were strictly solitary (4.5%), only one was strictly  
205 pair-living (0.9%), one showed sex-specific social organisation (0.9%), and eleven showed only  
206 one form of group-living (Table 1). A more detailed breakdown of variable social organisation is  
207 available in Supplementary Material Table S5. At the population level, 62% (155/247) of all  
208 populations also had variable social organisation. Of the 82 species showing variable social  
209 organisation, five (6.1%) showed variation between populations, twenty-nine (35.4%) showed  
210 variation within a population, and forty-eight (58.5%) showed variable social organisation both  
211 between populations and within a population.

212

213 A summary of the phylogenetic multilevel model is available in the Supplementary Material S6.  
214 The intercepts reflect a non-seasonally-breeding species of ancestral body size and sexual  
215 dimorphism that lives in only one habitat and was studied once. An ancestral population with  
216 these characteristics was predicted to have a variable social organisation with significantly higher  
217 probability (0.77, 95% CI 0.29-1.00) than any non-variable form (Figure 1).

218

219 The likelihood of variable social organisation increased with degree of sexual dimorphism (odds  
220 ratio for 1SD change = 2.91, 95% CI = 1.16 – 8.94), and decreased as female body mass  
221 increased (odds ratio for 1SD change = 0.39, 95% CI = 0.16 – 0.80; Figure 2). Pair-living was  
222 more likely with lower female body mass (Figure 2). Unsurprisingly, the probability of variable  
223 and sex-specific social organisations increased with study effort. No other associations were  
224 “significant” at the 95% CI level, but transitions to group-living were likelier with greater sexual  
225 dimorphism (PP=0.85) and seasonal breeding (PP=0.87). In terms of habitat type, the prediction  
226 of variable social organisation being less likely in open (savanna and native grasslands) than



227 closed (forest) habitats was not supported (PP=0.37). Similarly, support for group-living being  
228 more likely in open habitats was weak (PP=0.63). The phylogenetic signal in social organisation  
229 was weak but greater than 0 (mean = 0.24, 95% CI = 0.05 – 0.48).

230

231 The model for number of social organisations is summarized in Supplementary Materials S5.  
232 The predicted number of social organisations for the ancestor of all Artiodactyla was 1.73 (95%  
233 CI = 1.19 - 2.41), with no predictor influencing the number of social organisations at the 95% CI  
234 level. However, a decrease in number of social organisations with greater mean female body  
235 mass was relatively well supported (PP=0.91, consistent with Figure 2A). The prediction of  
236 fewer social organisations in open habitats compared to closed ones was again only weakly  
237 supported (PP=0.70). The phylogenetic signal was low (mean = 0.13, 95% CI = 1 e-5 – 0.29).

238

#### 239 **4. Discussion**

240

241 Our dataset revealed that IVSO occurred in 75% of Artiodactyla species. For species showing  
242 IVSO, social organisation was variable within 62% of populations. These trends are consistent  
243 with previous descriptions of IVSO in artiodactyls [58] and other mammals including Carnivora  
244 [27% of species classified as 'flexible'; 6], Eulipotyphla [43.8% of species with data; 21],  
245 Rodentia [16, 20], and strepsirrhine primates [60.5% of species with data; 22]. Mounting  
246 evidence of extensive IVSO in mammals challenges the common assumption in comparative  
247 studies that all species have only one social organisation [7, 59-61]. Failing to account for  
248 intraspecific variation will likely result in spurious conclusions about social evolution, slowing  
249 theoretical advancement [17, 25]. Using modern phylogenetic methods, we can now easily  
250 account for IVSO by analyzing data at the population rather than the species level. Moreover,  
251 greater effort should be made to build datasets from high-quality, primary sources rather than  
252 relying on secondary sources and taxonomic inference.

253

254 Our results change our understanding of social evolution. Both Jarman [18] and Pérez-Barbería  
255 et al. [13] assumed in their early comparative studies that the ancestral artiodactyl was socially  
256 monogamous (pair-living) with evolutionary transitions to polygyny and group-living. In  
257 contrast, Lukas & Clutton-Brock [7] argued that solitary living was the ancestral condition for

258 most mammalian orders, including Artiodactyla. Contrary to these studies, our analysis estimated  
259 the ancestral social organisation to be variable, with possible transitions to both pair-living or  
260 group-living depending on body size, or sexual dimorphism and breeding seasonality,  
261 respectively (or possible unmeasured variables that cause variation in these factors). Thus, our  
262 study supports the argument that IVSO plays an important role in the evolution of mammalian  
263 social systems [6, 17].

264  
265 Group-living and large body size are possible adaptations for artiodactyls living in open habitats  
266 [18, 40, 41] and to reduce predation risk [1]. Positive associations between group size and habitat  
267 openness have been observed in artiodactyls [62] and other mammals [e.g., 63]. Thus, we  
268 expected reduced IVSO in large bodied, group-living species in open habitats. In support of this  
269 hypothesis, both the probability of variable social organisation and the number of social  
270 organisations was low for species with large (and with very low) body mass but highest for  
271 species of intermediate body mass.

272  
273 Contrary to expectations, IVSO did not increase with increasing number of habitat types,  
274 suggesting that IVSO is not the result of selection for habitat-specific social organisations.  
275 Furthermore, neither the probability of variable social organisation or group-living nor the  
276 number of social organisations differed between open (savannas and grasslands) and closed  
277 habitats (forests). Ecological conditions, such as the spatiotemporal distribution of food  
278 resources as a result of unpredictable and/or variable precipitation and temperature, may have a  
279 greater effect than habitat type on the social organisation, as was suggested for artiodactyls [64].

280  
281 Reproductive competition changes seasonally in species that breed seasonally which in turn, can  
282 lead to greater variation in social organisation [36, 65]. Contrary to this expectation, artiodactyls  
283 that breed seasonally did not exhibit greater IVSO than non-seasonal breeders. Seasonal  
284 variation in local ecological conditions, such as the spatiotemporal variation in rainfall and food  
285 [17] may be more important predictors of IVSO than seasonality of breeding alone. The  
286 likelihood of IVSO increased with degree of sexual dimorphism. In polygynous systems, a large  
287 percentage of males may not breed [66]. Some males may live with other males in bachelor  
288 groups, increasing the prevalence of IVSO. In some species, such as African buffalo (*Syncerus*

289 *caffer*) there is a rotation system in which breeding males join herds of breeding females for a  
290 period of time [67]. During this time, the males breed and fight, but then re-join bachelor groups  
291 to recover from the energetic costs of breeding [67].

292

293 In conclusion, our study demonstrated three major points regarding social evolution: 1) ancestral  
294 artiodactyl social organisation was variable and not pair-living, as was long assumed, 2) in  
295 artiodactyls, the frequency of IVSO increased with increasing sexual dimorphism and decreased  
296 with body size, and 3) taking IVSO into account and using a high-quality dataset significantly  
297 changes our understanding of social evolution. Our study should motivate future efforts to  
298 understand the importance of IVSO in animal social evolution.

299

300

301 **Data accessibility.** R code and dataset available at

302 <https://github.com/adrianjaeggi/artiodactyl.socialorg>.

303

304 **Authors' contributions.** L.D.H. and C.S. conceived of the project and contributed to manuscript  
305 writing. M.I.M. collected data and contributed to manuscript writing. A.J. conducted the  
306 statistical analysis and contributed to manuscript writing. M.F.B. provided insight into  
307 artiodactyls and contributed to manuscript writing.

308

309 **Competing interests.** The authors declare that they have no competing interests.

310

311 **Funding.** M.I.M. was supported by the University of Tennessee at Chattanooga. CS was  
312 supported by the CNRS and the University of Strasbourg. M.F.B. was funded by Discovery  
313 Grants by the Natural Sciences and Engineering Research Council of Canada. L.D.H. was  
314 funded by the University of Tennessee at Chattanooga UC Foundation and a Visiting Scholar  
315 award from the University of Strasbourg Institute for Advanced Study.

316

317 **Acknowledgements.** H. Klug and T. Gaudin provided helpful comments on the manuscript.

318

319

## 320 References

- 321
- 322 1 Krause, J., Ruxton, G. D. 2002 *Living in Groups*. Oxford University Press.
- 323 2 Rubenstein, D. R., Abbot, P. 2017 *Comparative Social Evolution*. Cambridge, U.K.:
- 324 Cambridge University Press.
- 325 3 Kappeler, P. M. 2019 A framework for studying social complexity. *Behavioral Ecology and*
- 326 *Sociobiology*. **73**, 13.
- 327 4 Kappeler, P. M., van Schaik, C. P. 2002 Evolution of primate social systems. *International*
- 328 *Journal of Primatology*. **23**, 707-740. (10.1023/a:1015520830318)
- 329 5 Emlen, S. T., Oring, L. W. 1977 Ecology, sexual selection, and the evolution of mating
- 330 systems. *Science*. **197**, 215-223.
- 331 6 Dalerum, F. 2007 Phylogenetic reconstruction of carnivore social organizations. *Journal of*
- 332 *Zoology*. **273**, 90-97. (10.1111/j.1469-7998.2007.00303.x)
- 333 7 Lukas, D., Clutton-Brock, T. H. 2013 The evolution of social monogamy in mammals. *Science*.
- 334 **341**, 526-530.
- 335 8 Kappeler, P. M., Fichtel, C. 2016 The evolution of Eulemur social organization. *International*
- 336 *Journal of Primatology*. **37**, 10-28.
- 337 9 Shultz, S., Opie, C., Atkinson, Q. D. 2011 Stepwise evolution of stable sociality in primates.
- 338 *Nature*. **479**, 219-U296. (10.1038/nature10601)
- 339 10 Gittleman, J. L. 1989 Carnivore group living: comparative trends. In *Carnivore Behavior,*
- 340 *Ecology, and Evolution*. (ed.^eds. pp. 183-207: Springer.
- 341 11 Creel, S. 1995 Sociality, group size, and reproductive suppression among carnivores.
- 342 *Advances in the Study of Behaviour*. **24**, 203-257.
- 343 12 Schradin, C. 2017 Comparative studies need to rely both on sound natural history data and on
- 344 excellent statistical analysis. *Royal Society Open Science*. **4**, 170346.
- 345 13 Pérez-Barbería, F. J., Gordon, I., Pagel, M. 2002 The origins of sexual dimorphism in body
- 346 size in ungulates. *Evolution*. **56**, 1276-1285.
- 347 14 Lott, D. F. 1991 *Intraspecific Variation in the Social Systems of Wild Vertebrates*. Cambridge
- 348 University Press.
- 349 15 Aureli, F., Schaffner, C. M., Boesch, C., Bearder, S. K., Call, J., Chapman, C. A., Connor, R.,
- 350 Fiore, A. D., Dunbar, R. I., Henzi, S. P. 2008 Fission-fusion dynamics: new research
- 351 frameworks. *Current Anthropology*. **49**, 627-654.
- 352 16 Schradin, C. 2013 Intraspecific variation in social organization by genetic variation,
- 353 developmental plasticity, social flexibility or entirely extrinsic factors. *Philosophical*
- 354 *Transactions of the Royal Society B-Biological Sciences*. **368**, 20120346.
- 355 (10.1098/rstb.2012.0346)
- 356 17 Schradin, C., Hayes, L. D., Pillay, N., Bertelsmeier, C. 2018 The evolution of intraspecific
- 357 variation in social organization. *Ethology*. **124**, 527-536.
- 358 18 Jarman, P. 1974 The social organisation of antelope in relation to their ecology. *Behaviour*.
- 359 **48**, 215-267.
- 360 19 Yamagiwa, J., Kahekwa, J., Basabose, A. K. 2003 Intra-specific variation in social
- 361 organization of gorillas: implications for their social evolution. *Primates*. **44**, 359-369.
- 362 (10.1007/s10329-003-0049-5)
- 363 20 Maher, C. R., Burger, J. R. 2011 Intraspecific variation in space use, group size, and mating
- 364 systems of caviomorph rodents. *Journal of Mammalogy*. **92**, 54-64. (10.1644/09-mamm-s-
- 365 317.1)

- 366 21 Valomy, M., Hayes, L. D., Schradin, C. 2015 Social organization in Eulipotyphla: evidence  
367 for a social shrew. *Biology Letters*. **11**, (10.1098/rsbl.2015.0825)
- 368 22 Agnani, P., Kauffmann, C., Hayes, L. D., Schradin, C. 2018 Intra-specific variation in social  
369 organization of Strepsirrhines. *American Journal of Primatology*. **80**, e22758.
- 370 23 Harmon, L. J., Losos, J. B. 2005 The effect of intraspecific sample size on type I and type II  
371 error rates in comparative studies. *Evolution*. **59**, 2705-2710.
- 372 24 Garamszegi, L. Z. 2014 Uncertainties due to within-species variation in comparative studies:  
373 measurement errors and statistical weights. In *Modern Phylogenetic Comparative Methods and  
374 Their Application in Evolutionary Biology*. (ed.^eds. pp. 157-199: Springer.
- 375 25 Sandel, A. A., Miller, J. A., Mitani, J. C., Nunn, C. L., Patterson, S. K., Garamszegi, L. Z.  
376 2016 Assessing sources of error in comparative analyses of primate behavior: intraspecific  
377 variation in group size and the social brain hypothesis. *Journal of Human Evolution*. **94**, 126-  
378 133.
- 379 26 Schneider, T. C., Kappeler, P. M. 2014 Social systems and life-history characteristics of  
380 mongooses. *Biological Reviews*. **89**, 173-198. (10.1111/brv.12050)
- 381 27 de Villemereuil, P., Nakagawa, S. 2014 General quantitative genetic methods for comparative  
382 biology. In *Modern Phylogenetic Comparative Methods and Their Application in Evolutionary  
383 Biology*. (ed.^eds. pp. 287-303: Springer.
- 384 28 Blomberg, S. P., Garland, T., Ives, A. R. 2003 Testing for phylogenetic signal in comparative  
385 data: behavioral traits are more labile. *Evolution*. **57**, 717-745.
- 386 29 Kamilar, J. M., Cooper, N. 2013 Phylogenetic signal in primate behaviour, ecology and life  
387 history. *Proceedings of the Royal Society B-Biological Sciences*. **368**, 20120341.
- 388 30 Strier, K. B., Lee, P. C., Ives, A. R. 2014 Behavioral flexibility and the evolution of primate  
389 social states. *PloS one*. **9**, e114099.
- 390 31 Difiore, A., Rendall, D. 1994 Evolution of social organization - a reappraisal for primates  
391 using phylogenetic methods. *Proceedings of the National Academy of Sciences of the United  
392 States of America*. **91**, 9941-9945.
- 393 32 Thierry, B. 2013 Identifying constraints in the evolution of primate societies. *Philosophical  
394 Transactions of the Royal Society of London B: Biological Sciences*. **368**, 20120342.
- 395 33 Jaeggi, A. V., Boose, K. J., White, F. J., Gurven, M. 2016 Obstacles and catalysts of  
396 cooperation in humans, bonobos, and chimpanzees: behavioural reaction norms can help explain  
397 variation in sex roles, inequality, war and peace. *Behaviour*. **153**, 1015-1051.
- 398 34 Hamel, S., Gaillard, J. M., Yoccoz, N. G., Loison, A., Bonenfant, C., Descamps, S. 2010  
399 Fitness costs of reproduction depend on life speed: empirical evidence from mammalian  
400 populations. *Ecology letters*. **13**, 915-935.
- 401 35 van Schaik, C. P., van Hooff, J. 1983 On the ultimate causes of primate social systems.  
402 *Behaviour*. **85**, 91-117.
- 403 36 Schradin, C., König, B., Pillay, N. 2010 Reproductive competition favours solitary living  
404 while ecological constraints impose group-living in African striped mice. *Journal of Animal  
405 Ecology*. **79**, 515-521.
- 406 37 van Schaik, C. P. 1983 Why are diurnal primates living in groups? *Behaviour*. **87**, 120-144.
- 407 38 Pérez-Barbería, F. J., Gordon, I. J. 2000 Differences in body mass and oral morphology  
408 between the sexes in the Artiodactyla: evolutionary relationships with sexual segregation.  
409 *Evolutionary Ecology Research*. **2**, 667-684.
- 410 39 Hirth, D. H. 1997 Lek breeding in a Texas population of fallow deer (*Dama dama*). *American  
411 Midland Naturalist*. **138**, 276-289. (10.2307/2426821)

- 412 40 Caro, T., Graham, C., Stoner, C., Vargas, J. 2004 Adaptive significance of antipredator  
413 behaviour in artiodactyls. *Animal behaviour*. **67**, 205-228.
- 414 41 Molvar, E. M., Bowyer, R. T. 1994 Costs and benefits of group living in a recently social  
415 ungulate - the Alaskan moose. *Journal of Mammalogy*. **75**, 621-630. (10.2307/1382509)
- 416 42 Ruckstuhl, K. E., Neuhaus, P. 2002 Sexual segregation in ungulates: a comparative test of  
417 three hypotheses. *Biological Reviews*. **77**, 77-96.
- 418 43 Mooring, M. S., Reisig, D. D., Osborne, E. R., Kanallakan, A. L., Hall, B. M., Schaad, E. W.,  
419 Wiseman, D. S., Huber, R. R. 2005 Sexual segregation in bison: a test of multiple hypotheses.  
420 *Behaviour*. **142**, 897-927.
- 421 44 Clutton-Brock, T. H., Guinness, F. E., Albon, S. D. 1982 *Red Deer: Behavior and Ecology of*  
422 *Two Sexes*. University of Chicago press.
- 423 45 Kie, J. G., Bowyer, R. T. 1999 Sexual segregation in white-tailed deer: Density-dependent  
424 changes in use of space, habitat selection, and dietary niche. *Journal of Mammalogy*. **80**, 1004-  
425 1020. (10.2307/1383271)
- 426 46 Ruckstuhl, K. E., Neuhaus, P. 2009 Activity budgets and sociality in a monomorphic  
427 ungulate: the African oryx (*Oryx gazella*). *Canadian Journal of Zoology-Revue Canadienne De*  
428 *Zoologie*. **87**, 165-174. (10.1139/z08-148)
- 429 47 Wilson, D. E., Reeder, D. M. 2005 *Mammal Species of the World: A Taxonomic and*  
430 *Geographic Reference*. JHU Press.
- 431 48 Bininda-Emonds, O. R., Cardillo, M., Jones, K. E., MacPhee, R. D., Beck, R. M., Grenyer,  
432 R., Price, S. A., Vos, R. A., Gittleman, J. L., Purvis, A. 2007 The delayed rise of present-day  
433 mammals. *Nature*. **446**, 507.
- 434 49 Paradis, E., Claude, J., Strimmer, K. 2004 APE: analyses of phylogenetics and evolution in R  
435 language. *Bioinformatics*. **20**, 289-290.
- 436 50 R Development Core Team. R: A language and environment for statistical computing. 2015.
- 437 51 Revell, L. J. 2012 phytools: an R package for phylogenetic comparative biology (and other  
438 things). *Methods in Ecology and Evolution*. **3**, 217-223.
- 439 52 Koster, J., McElreath, R. 2017 Multinomial analysis of behavior: statistical methods.  
440 *Behavioral Ecology and Sociobiology*. **71**, 138.
- 441 53 McElreath, R. 2018 *Statistical Rethinking: A Bayesian Course with Examples in R and Stan*.  
442 CRC Press.
- 443 54 Carpenter, B., Gelman, A., Hoffman, M. D., Lee, D., Goodrich, B., Betancourt, M., Brubaker,  
444 M., Guo, J., Li, P., Riddell, A. 2017 Stan: A probabilistic programming language. *Journal of*  
445 *Statistical Software*. **76**,
- 446 55 Stan Development Team. RStan: the R interface to Stan. *R package version* 2018.
- 447 56 Bürkner, P.-C. 2017 brms: An R package for Bayesian multilevel models using Stan. *Journal*  
448 *of Statistical Software*. **80**, 1-28.
- 449 57 Nakagawa, S., Schielzeth, H. 2013 A general and simple method for obtaining R<sup>2</sup> from  
450 generalized linear mixed-effects models. *Methods in Ecology and Evolution*. **4**, 133-142.
- 451 58 Estes, R. D. 1974 Social organization of the African Bovidae. *The behaviour of ungulates and*  
452 *its relation to management*. **1**, 166-205.
- 453 59 Jetz, W., Rubenstein, D. R. 2011 Environmental Uncertainty and the Global Biogeography of  
454 Cooperative Breeding in Birds. *Current Biology*. **21**, 72-78. (10.1016/j.cub.2010.11.075)
- 455 60 Lukas, D., Clutton-Brock, T. 2012 Cooperative breeding and monogamy in mammalian  
456 societies. *Proceedings of the Royal Society B-Biological Sciences*. **279**, 2151-2156.  
457 (10.1098/rspb.2011.2468)

- 458 61 Lukas, D., Clutton-Brock, T. 2017 Climate and the distribution of cooperative breeding in  
459 mammals. *Royal Society Open Science*. **4**, 160897.
- 460 62 Isvaran, K. 2007 Intraspecific variation in group size in the blackbuck antelope: the roles of  
461 habitat structure and forage at different spatial scales. *Oecologia*. **154**, 435-444.  
462 (10.1007/s00442-007-0840-x)
- 463 63 Kaufmann, J. H. 1974 The ecology and evolution of social organization in the kangaroo  
464 family (Macropodidae). *American Zoologist*. **14**, 51-62.
- 465 64 Brashares, J. S., Arcese, P. 2002 Role of forage, habitat and predation in the behavioural  
466 plasticity of a small African antelope. *Journal of Animal Ecology*. **71**, 626-638.
- 467 65 Clutton-Brock, T., Hodge, S., Spong, G., Russell, A., Jordan, N., Bennett, N., Sharpe, L.,  
468 Manser, M. 2006 Intrasexual competition and sexual selection in cooperative mammals. *Nature*.  
469 **444**, 1065.
- 470 66 Dubuc, C., Ruiz-Lambides, A., Widdig, A. 2014 Variance in male lifetime reproductive  
471 success and estimation of the degree of polygyny in a primate. *Behavioral Ecology*. **25**, 878-889.
- 472 67 Prins, H. 1989 Buffalo herd structure and its repercussions for condition of individual African  
473 buffalo cows. *Ethology*. **81**, 47-71.
- 474 68 Gross, M. R. 1996 Alternative reproductive strategies and tactics: diversity within sexes.  
475 *Trends in Ecology & Evolution*. **11**, 92-98.

476

477

478

479

480

481

482

483

484

485

486

487

488

489

490

491

492

493

494

495 **Tables**

496

497 **Table 1. Social organisations of Artiodactyla species**

| <b>Category</b>                                                            | <b>No. and percentage</b> |
|----------------------------------------------------------------------------|---------------------------|
| <b>Solitary</b>                                                            | 5 (4.5%)                  |
| <b>Pair-living</b>                                                         | 1 (0.9%)                  |
| <b>Sex-specific</b>                                                        | 1 (0.9%)                  |
| <b>Group-living, only, but split into:</b>                                 |                           |
| - <b>No variation in group composition</b>                                 | 11 (10.0%)                |
| - <b>Variable group composition*</b>                                       | 21 (19.1%)                |
| - <b>Unknown composition</b>                                               | 10 (9.1%)                 |
| <b>Species with more than one social organisation</b>                      | 61 (55.5%)                |
| <b>Species with variable group composition</b>                             | 42 (38.2%)                |
| <b>Species with any form of IVSO, including variable group composition</b> | 82 (74.5%)                |
| <b>Species with data</b>                                                   | 110 (48.7%)               |
| <b>Species with no data</b>                                                | 116 (51.3%)               |

498 \* *Variable includes more than one of the following: single male, multiple females (MFF); single*  
 499 *female, multiple males (FFM); multiple males, multiple females (MMFF); unisex groups, both*  
 500 *male-only and female-only in the same population.*

501

502

503

504

505

506

507

508

509

510

511





521

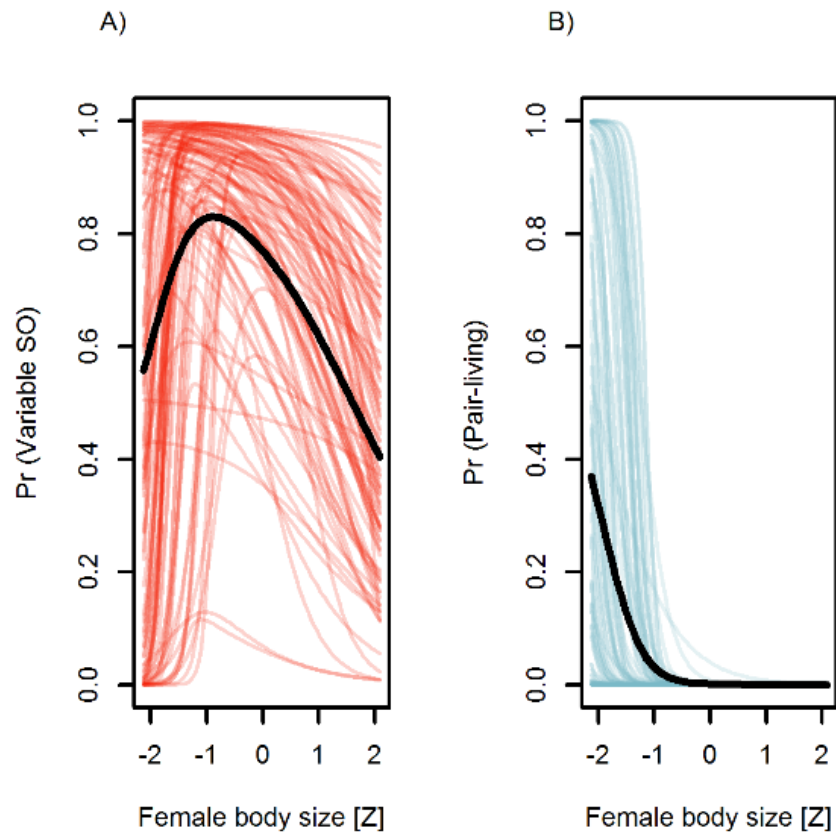

522

523 **Figure 2.** Probability of A) variable social organisation and B) pair-living as a function of female  
524 body size. Solid black lines indicate mean predicted values; thin lines represent 100 randomly  
525 drawn posterior samples to illustrate uncertainty.

526

527
